# Supplementary material for: The Role of Statins on Helicobacter pylori Eradication: Results from the European Registry on the Management of H. pylori (Hp-EuReg)
Source: MDPI journal article supplement (doi:10.3390/antibiotics10080965), 2021-08-11
Supplement: s1 [file s1]

Archive with 1 entries (1 files):
- antibiotics-1297329-supplementary_addendum_definitive-1.pdf
